# Supplementary material
Source: PubMed Central journal article supplement (PMC1184568)
Supplement: bj3900125add.pdf [file bj3900125add.pdf]

## SUPPLEMENTS

**Supplement 1: Data and refinement statistics for X-ray crystal structure determination.**

Values for the determination of the X-ray crystal structure of human hepsin with the KQLR-chloromethylketone (KQLR-cmk) peptide inhibitor.

| <i>Data (Hepsin / KQLR-cmk Complex)</i>          |                                                   |
|--------------------------------------------------|---------------------------------------------------|
| Space group                                      | P2 <sub>1</sub>                                   |
| Unit cell                                        | a = 55.7 Å, b = 47.6 Å,<br>c = 67.8 Å, β = 108.2° |
| Resolution range (Å) (outer shell)               | 24-1.55 (1.61-1.55)                               |
| Number of observations                           | 163831                                            |
| Number of unique reflections                     | 46843                                             |
| Completeness (%) (outer shell)                   | 95.0 (59.2)                                       |
| R <sub>sym</sub> (%) (outer shell)               | 5.6 (32.7)                                        |
| I/σI (outer shell)                               | 21.6 (2.1)                                        |
| <i>Model (Hepsin / KQLR-cmk Complex)</i>         |                                                   |
| Molecules in the asymmetric unit                 | 1                                                 |
| R <sub>cryst</sub> /R <sub>free</sub> (all data) | 0.198/0.217                                       |
| RMS deviations from ideal geometry               |                                                   |
| Bonds (Å)                                        | 0.004                                             |
| Angles (°)                                       | 1.343                                             |
| PDB ID: 1Z8G                                     |                                                   |
